# Supplementary material for: Immune cell multi-omics analysis reveals contribution of oxidative phosphorylation to B cell functions and organ damage of lupus
Source: bioRxiv or medRxiv preprint supplement (doi:10.1101/2021.10.08.463629), 2021-10-09
Supplement: Supplementary file [file media-2.pdf]

1 **Online supplementary materials and methods**

2 **Online Supplemental Table S1. Each ETC complex gene list used in this study.**

3

| <b>Complex I</b> | <b>Complex II</b> | <b>Complex III</b> | <b>Complex IV</b> | <b>Complex V</b> |
|------------------|-------------------|--------------------|-------------------|------------------|
| NDUFA1           | SDHA              | CYC1               | COX4I1            | ATP5F1A          |
| NDUFA10          | SDHB              | UQCR10             | COX4I2            | ATP5F1B          |
| NDUFA11          | SDHC              | UQCR11             | COX5A             | ATP5F1C          |
| NDUFA12          | SDHD              | UQCRB              | COX5B             | ATP5F1D          |
| NDUFA13          |                   | UQCRC1             | COX6A1            | ATP5F1E          |
| NDUFA2           |                   | UQCRC2             | COX6A2            | ATP5IF1          |
| NDUFA3           |                   | UQCRFS1            | COX6B1            | ATP5MC1          |
| NDUFA5           |                   | UQCRH              | COX6B2            | ATP5MC2          |
| NDUFA6           |                   | UQCRQ              | COX6C             | ATP5MC3          |
| NDUFA7           |                   |                    | COX7A1            | ATP5MD           |
| NDUFA8           |                   |                    | COX7A2            | ATP5ME           |
| NDUFA9           |                   |                    | COX7B             | ATP5MF           |
| NDUFAB1          |                   |                    | COX7B2            | ATP5MG           |
| NDUFB1           |                   |                    | COX7C             | ATP5MPL          |
| NDUFB10          |                   |                    | COX8A             | ATP5PB           |
| NDUFB11          |                   |                    | COX8C             | ATP5PD           |
| NDUFB2           |                   |                    |                   | ATP5PF           |
| NDUFB3           |                   |                    |                   | ATP5PO           |
| NDUFB4           |                   |                    |                   |                  |
| NDUFB5           |                   |                    |                   |                  |
| NDUFB6           |                   |                    |                   |                  |
| NDUFB7           |                   |                    |                   |                  |
| NDUFB8           |                   |                    |                   |                  |
| NDUFB9           |                   |                    |                   |                  |
| NDUFC1           |                   |                    |                   |                  |
| NDUFC2           |                   |                    |                   |                  |
| NDUFS1           |                   |                    |                   |                  |
| NDUFS2           |                   |                    |                   |                  |

|        |  |  |  |  |
|--------|--|--|--|--|
| NDUFS3 |  |  |  |  |
| NDUFS4 |  |  |  |  |
| NDUFS5 |  |  |  |  |
| NDUFS6 |  |  |  |  |
| NDUFS7 |  |  |  |  |
| NDUFS8 |  |  |  |  |
| NDUFV1 |  |  |  |  |
| NDUFV2 |  |  |  |  |
| NDUFV3 |  |  |  |  |

1 **Online Supplemental Table S2. Results of cis-eQTL analysis using RNA-seq and genotyping data from our IMD patients and**  
2 **HCs.**

3

| SLE GWAS Top | eQTL Top   | Subset  | $r^2_{\text{JPN}}$ | $r^2_{\text{EUR}}$ | eGene   | Aliases and/or Function of eGene               | References                                                                                                       |
|--------------|------------|---------|--------------------|--------------------|---------|------------------------------------------------|------------------------------------------------------------------------------------------------------------------|
| rs1385374    | rs3765107  | DN B    | 0.955              | 1.000              | SLC15A4 |                                                | SLC15A4 in B cells regulates type I IFN production through regulation of TLR7/9 as well as mTORC1 signaling [1]. |
| rs1385374    | rs3765107  | Naïve B | 0.955              | 1.000              | SLC15A4 |                                                |                                                                                                                  |
| rs11059927   | rs3765107  | DN B    | 0.955              | 1.000              | SLC15A4 | Histidine transporter on lysosomes             |                                                                                                                  |
| rs11059927   | rs3765107  | Naive B | 0.955              | 1.000              | SLC15A4 |                                                |                                                                                                                  |
| rs2422345    | rs11484635 | USM B   | 0.995              | 0.995              | TNFSF4  |                                                | OX40L-expressing B cells supports plasma cell differentiation and Tfh maturation [2].                            |
| rs4916342    | rs11484635 | USM B   | 0.995              | 0.930              | TNFSF4  | OX40L                                          |                                                                                                                  |
| rs10753074   | rs11484635 | USM B   | 0.995              | 0.991              | TNFSF4  |                                                |                                                                                                                  |
| rs4426778    | rs7686702  | Naive B | 1.000              | 0.985              | BANK1   | B cell scaffold protein with ankyrin repeats 1 | BANK1 on B cell promotes antigen presentation ability and autoantibody production [3].                           |
| rs11085725   | rs11085727 | SM B    | 0.962              | 1.000              | TYK2    | Tyrosine kinase 2                              |                                                                                                                  |

|            |            |             |       |       |        |                                   |  |
|------------|------------|-------------|-------|-------|--------|-----------------------------------|--|
| rs11085725 | rs35251378 | DN B        | 0.991 | 0.995 | TYK2   |                                   |  |
| rs11085725 | rs35251378 | Plasmablast | 0.991 | 0.995 | TYK2   |                                   |  |
| rs11085727 | rs11085727 | SM B        | 0.961 | 0.995 | TYK2   |                                   |  |
| rs11085727 | rs35251378 | DN B        | 0.961 | 0.995 | TYK2   |                                   |  |
| rs11085727 | rs35251378 | Plasmablast | 0.961 | 0.995 | TYK2   |                                   |  |
| rs1170426  | rs1728797  | USM B       | 0.992 | 1.000 | ZFP90  |                                   |  |
| rs1170426  | rs4783650  | Naive B     | 1.000 | 0.849 | ZFP90  | Zink finger protein               |  |
| rs131658   | rs5754467  | SM B        | 0.956 | 0.800 | UBE2L3 |                                   |  |
| rs3747093  | rs5754467  | SM B        | 0.996 | 0.974 | UBE2L3 | Ubiquitin conjugating enzyme E2L3 |  |
| rs2061831  | rs2061831  | Naive B     | 0.995 | 1.000 | BLK    |                                   |  |
| rs2061831  | rs2409780  | USM B       | 0.995 | 1.000 | BLK    |                                   |  |
| rs2254546  | rs2254546  | Plasmablast | 0.937 | 0.993 | BLK    |                                   |  |
| rs2618444  | rs2061831  | Naive B     | 0.990 | 1.000 | BLK    | B lymphoid tyrosine kinase        |  |
| rs2618444  | rs2409780  | USM B       | 0.995 | 1.000 | BLK    |                                   |  |
| rs2618476  | rs2061831  | Naive B     | 0.924 | 0.950 | BLK    |                                   |  |
| rs2618476  | rs2409780  | USM B       | 0.919 | 0.950 | BLK    |                                   |  |

Tyk2 tyrosine kinase expression is required for the maintenance of mitochondrial respiration in primary pro-B lymphocytes [4].

ZFP90 transgenic mice showed altered expression of OXPHOS related genes [5].

UBE2N, UBE2L3, and UBE2D2/3 contribute to Parkin-mediated mitophagy [6].

BLK and BANK1 act through PLC gamma 2 in B cell signaling [7].

|            |             |             |       |       |         |                           |                                                                                                                                   |
|------------|-------------|-------------|-------|-------|---------|---------------------------|-----------------------------------------------------------------------------------------------------------------------------------|
| rs2736332  | rs2061831   | Naive B     | 0.995 | 0.876 | BLK     |                           |                                                                                                                                   |
| rs2736332  | rs2409780   | USM B       | 1.000 | 0.876 | BLK     |                           |                                                                                                                                   |
| rs2736337  | rs2061831   | Naive B     | 0.962 | 0.995 | BLK     |                           |                                                                                                                                   |
| rs2736337  | rs2409780   | USM B       | 0.957 | 0.995 | BLK     |                           |                                                                                                                                   |
| rs2736340  | rs2061831   | Naive B     | 0.957 | 0.995 | BLK     |                           |                                                                                                                                   |
| rs2736340  | rs2409780   | USM B       | 0.952 | 0.995 | BLK     |                           |                                                                                                                                   |
| rs7812879  | rs2254546   | Plasmablast | 0.911 | 0.986 | BLK     |                           |                                                                                                                                   |
| rs13277113 | rs2061831   | Naive B     | 0.897 | 0.990 | BLK     |                           |                                                                                                                                   |
| rs13277113 | rs2409780   | USM B       | 0.893 | 0.990 | BLK     |                           |                                                                                                                                   |
| rs2299864  | rs1322178   | Plasmablast | 0.981 | 0.964 | ATG5    |                           | Mitochondrial quality control after oxidative damage.                                                                             |
| rs9373839  | rs1322178   | Plasmablast | 0.981 | 0.959 | ATG5    | Autophagy related 5       | Localizes to punctae on mitochondria [8].                                                                                         |
| rs2732549  | rs146368551 | Naive B     | 0.821 | 0.913 | CD44    | Cell surface glycoprotein | CD44 <sup>lo</sup> to CD44 <sup>hi</sup> conversion of esophageal keratinocytes induces mitochondrial dysfunction and OXPHOS [9]. |
| rs3794060  | rs732934    | Naive B     | 1.000 | 1.000 | NADSYN1 |                           |                                                                                                                                   |
| rs3794060  | rs732934    | USM B       | 1.000 | 1.000 | NADSYN1 | NAD synthetase 1          |                                                                                                                                   |

|            |            |             |       |       |       |                                                   |                                                                                                                                                                    |
|------------|------------|-------------|-------|-------|-------|---------------------------------------------------|--------------------------------------------------------------------------------------------------------------------------------------------------------------------|
| rs6445975  | rs4681845  | Naive B     | 0.914 | 0.971 | PXK   | PX domain containing serine/threonine kinase like | PXK influenced the rate of BCR internalization [10].                                                                                                               |
| rs6445975  | rs4681845  | SM B        | 0.914 | 0.971 | PXK   |                                                   |                                                                                                                                                                    |
| rs6445975  | rs4681845  | USM B       | 0.914 | 0.971 | PXK   |                                                   |                                                                                                                                                                    |
| rs7258015  | rs2304237  | Naive B     | 1.000 | 0.979 | ICAM3 | Ig-like adhesion molecule                         | ICAM-3 crosslinking induced the production of reactive oxygen species (ROS), which are known to be involved in the control of endothelial cell-cell contacts [11]. |
| rs7258015  | rs2304237  | USM B       | 1.000 | 0.979 | ICAM3 |                                                   |                                                                                                                                                                    |
| rs73366469 | rs73366469 | Plasmablast | 0.853 | 1.000 | NCF1  | Subunit of NADPH oxidase                          |                                                                                                                                                                    |
| rs9782955  | rs2104125  | DN B        | 0.990 | 0.959 | LYST  | Lysosomal trafficking regulator                   | Lyst mutation results in elevated levels of oxidative damage to lipid membranes [12].                                                                              |
| rs9782955  | rs2104125  | Naive B     | 0.990 | 0.959 | LYST  |                                                   |                                                                                                                                                                    |
| rs9782955  | rs2104125  | SM B        | 0.990 | 0.959 | LYST  |                                                   |                                                                                                                                                                    |

1

## 2 References

- 3 1 Kobayashi T, Shimabukuro-Demoto S, Yoshida-Sugitani R, *et al.* The histidine transporter SLC15A4 coordinates mTOR-  
4 dependent inflammatory responses and pathogenic antibody production. *Immunity* 2014;**41**:375–88.

- 1 2 Cortini A, Ellinghaus U, Malik TH, *et al.* B cell OX40L supports T follicular helper cell development and contributes to SLE  
2 pathogenesis. *Ann Rheum Dis* 2017;**76**:2095–103.
- 3 3 Yang J, Ren J, Yang Y, *et al.* BANK1 alters B cell responses and influences the interactions between B cells and induced T  
4 regulatory cells in mice with collagen-induced arthritis. *Arthritis Res Ther* 2018;**20**:1–13.
- 5 4 Potla R, Koeck T, Wegrzyn J, *et al.* Tyk2 Tyrosine Kinase Expression Is Required for the Maintenance of Mitochondrial  
6 Respiration in Primary Pro-B Lymphocytes. *Mol Cell Biol* 2006;**26**:8562–71.
- 7 5 Yang X, Deignan JL, Qi H, *et al.* Validation of candidate causal genes for obesity that affect shared metabolic pathways and  
8 networks. *Nat Genet* 2009;**41**:415–23.
- 9 6 Geisler S, Vollmer S, Golombek S, *et al.* The ubiquitin-conjugating enzymes UBE2N, UBE2L3 and UBE2D2/3 are essential  
10 for Parkin-dependent mitophagy. *J Cell Sci* 2014;**127**:3280–93.
- 11 7 Bernal-Quirós M, Wu YY, Alarcón-Riquelme ME, *et al.* BANK1 and BLK Act through Phospholipase C Gamma 2 in B-Cell  
12 Signaling. *PLoS One* 2013;**8**.
- 13 8 Hailey DW, Rambold AS, Satpute-Krishnan P, *et al.* Mitochondria Supply Membranes for Autophagosome Biogenesis during  
14 Starvation. *Cell* 2010;**141**:656–67.
- 15 9 Whelan KA, Chandramouleeswaran PM, Tanaka K, *et al.* Autophagy supports generation of cells with high CD44 expression  
16 via modulation of oxidative stress and Parkin-mediated mitochondrial clearance. *Oncogene* 2017;**36**:4843–58.

- 1 10 Vaughn SE, Foley C, Shen N, *et al.* Lupus risk variants in the PXX locus alter B-cell receptor internalization. *Front Genet*  
2 2014;**5**:1–12.
- 3 11 Van Buul JD, Mul FPJ, Van Der Schoot CE, *et al.* ICAM-3 Activation Modulates Cell-Cell Contacts of Human Bone Marrow  
4 Endothelial Cells. *J Vasc Res* 2004;**41**:28–37.
- 5 12 Trantow CM, Hedberg-Buenz A, Iwashita S, *et al.* Elevated oxidative membrane damage associated with genetic modifiers of  
6 Lyst-mutant phenotypes. *PLoS Genet* 2010;**6**:1–12.  
7  
8



- 1 Online Supplemental Table S3. Parent subset common DEGs in test and validation cohorts with the information of *cis*-eQTL  
 2 analysis

| Gene    | subset common DEGs |            |             |            |            |            |              |            | eQTL & GWAS |     |    |      |        |
|---------|--------------------|------------|-------------|------------|------------|------------|--------------|------------|-------------|-----|----|------|--------|
|         | B<br>test          | validation | CD4<br>test | validation | DC<br>test | validation | Mono<br>test | validation | B           | CD4 | DC | Mono | others |
| CLSPN   |                    |            |             |            |            |            |              |            |             |     |    |      |        |
| GCA     |                    |            |             |            |            |            |              |            |             |     |    |      |        |
| IL18R1  |                    |            | *           |            |            |            |              |            |             | *   |    |      |        |
| IL18RAP |                    |            |             |            |            |            |              |            |             |     |    |      |        |
| IL7     | *                  |            | *           |            |            |            |              |            | *           | *   |    |      |        |
| LGALS9  | *                  |            |             |            | *          |            | *            |            | *           |     | *  | *    |        |
| NCF2    |                    |            |             |            |            |            |              |            |             |     |    |      |        |
| NEU1    |                    |            |             |            |            |            |              |            |             |     |    |      |        |
| PDHX    |                    |            |             |            |            |            |              |            |             |     |    |      |        |
| PHKG2   |                    |            |             |            |            |            |              |            |             |     |    |      |        |
| PKIA    | *                  |            | *           |            |            |            |              |            | *           | *   |    |      |        |
| PRDM1   |                    |            |             |            |            |            |              |            |             |     |    |      |        |
| PRDX6   | *                  |            |             |            |            |            |              |            | *           |     |    |      |        |
| PRNP    |                    |            |             |            |            |            |              |            |             |     |    |      |        |
| PYCARD  |                    |            | *           |            |            |            |              |            |             | *   |    |      |        |
| RGS1    |                    |            | *           |            |            |            |              |            |             | *   |    |      |        |
| RPL10A  |                    |            |             |            |            |            | *            |            |             |     |    | *    |        |
| SERBP1  |                    |            |             |            |            |            |              |            |             |     |    |      |        |

- 3 An asterisk (\*) indicates a candidate gene which was picked up as a DEG in both cohorts and also eGene from eQTL and GWAS.

1 **Online Supplemental Table S4. Gene lists of each type I IFN signaling-related gene cluster.**  
 2

| C1      | C2      | C3       | C4       | C5      | C6       |
|---------|---------|----------|----------|---------|----------|
| RNF135  | ITCH    | POLR1D   | TRIM25   | RIPK2   | POLR3H   |
| MB21D1  | TRAIP   | PCBP2    | ADAR     | PTPN22  | HSP90AB1 |
| IKBKE   | IRF4    | RPS27A   | STAT2    | TBK1    | HSPD1    |
| PTPN6   | DHX9    | UBA52    | DHX58    | PTPN2   | XRCC5    |
| UBC     | SAMHD1  | TRAF3IP1 | OAS3     | POLR2K  | XRCC6    |
| CDC37   | CTNNB1  | PRKDC    | IRF7     | POLR3GL | FADD     |
| UBA7    | ZC3HAV1 | CRCP     | OAS2     | TAX1BP1 | IRF2     |
| IRF1    | POLR3B  | CREBBP   | C19orf66 | UBE2K   | GBP2     |
| RELA    | EP300   | RNF216   | IRF9     | MRE11A  | HAVCR2   |
| HLA-A   | POLR3A  | PTPN11   | TRIM38   | IFNAR1  | PYCARD   |
| MYD88   | ZBTB20  | LRRFIP1  | DDX58    | IFNAR2  | PIN1     |
| TNFAIP3 | JAK1    | DHX36    | IFIH1    |         | POLR2L   |
| IRF5    | REL     | PPM1B    | STAT1    |         | POLR2F   |
| NLRC5   | IRF8    | TRAF3    | SP100    |         | UBB      |
| STAT6   | RNASEL  | OTUD5    | IFI16    |         | HMGB2    |
| TYK2    | POLR3F  | RELB     | NMI      |         | ISG20    |
| PTPN1   | TRIM32  | NFKB1    | UBE2L6   |         | HMGB1    |
| TICAM1  | LSM14A  | NFKB2    | BST2     |         | POLR3K   |
| NLRX1   | CYLD    | IRAK1    | IFI35    |         | POLR1C   |
| TRIM56  | DDX3X   | PLCG2    | MX2      |         | POLR3C   |
| POLR3E  |         | POLR2H   | OASL     |         | IP6K2    |
| MAVS    |         | POLR3D   | HERC5    |         | HLA-E    |
| TIRAP   |         |          | XAF1     |         | HLA-F    |
| HLA-B   |         |          | IFIT1    |         |          |
| HLA-C   |         |          | IFIT3    |         |          |
| HLA-H   |         |          | IFITM1   |         |          |
| MUL1    |         |          | IFI6     |         |          |
| TMEM173 |         |          | IFI27    |         |          |
| DDX41   |         |          | MX1      |         |          |
| SHMT2   |         |          | RSAD2    |         |          |
| HLA-G   |         |          | OAS1     |         |          |
| FLOT1   |         |          | ISG15    |         |          |
| IRF3    |         |          | USP18    |         |          |

|        |  |  |        |  |  |
|--------|--|--|--------|--|--|
| POLR2E |  |  | IFITM2 |  |  |
|        |  |  | IFITM3 |  |  |
|        |  |  | TREX1  |  |  |
|        |  |  | PSMB8  |  |  |
|        |  |  | TRIM21 |  |  |

1

1 **Online Supplemental Table S5. Correlation of C1 to C5 signatures with the OXPPOS signature in each immune cell subset**

2

3 Test cohort

| subset           | Cluster1 |             |       | Cluster2 |             |      | Cluster3     |             |    | Cluster4 |             |       | Cluster5 |             |    |
|------------------|----------|-------------|-------|----------|-------------|------|--------------|-------------|----|----------|-------------|-------|----------|-------------|----|
|                  | <i>r</i> | <i>q</i>    |       | <i>r</i> | <i>q</i>    |      | <i>r</i>     | <i>q</i>    |    | <i>r</i> | <i>q</i>    |       | <i>r</i> | <i>q</i>    |    |
| Naive B          | -0.34    | 0.03        | *     | -0.24    | 0.11        |      | -0.21        | 0.24        |    | 0.3      | 0.09        |       | 0.33     | 0.05        | *  |
| SM B             | 0.03     | 0.85        |       | -0.63    | 1.3<br>xE-5 | **** | 0.47         | 7.2<br>xE-3 | ** | 0.53     | 5.1<br>xE-4 | ***   | 0.31     | 0.05        | *  |
| USM B            | -0.11    | 0.49        |       | -0.46    | 3.8<br>xE-3 | **   | 0.29         | 0.12        |    | 0.3      | 0.09        |       | 0.41     | 0.03        | *  |
| DN B             | -0.44    | 2.9<br>xE-3 | **    | -0.6     | 3.9<br>xE-5 | **** | -0.08        | 0.7         |    | 0.02     | 0.91        |       | 0.24     | 0.11        |    |
| Plasma-<br>blast | -0.5     | 4.8<br>xE-4 | ***   | -0.5     | 9.0<br>xE-4 | ***  | -0.23        | 0.21        |    | 0.45     | 6.4<br>xE-3 | **    | 0.37     | 0.03        | *  |
| Th1              | -0.51    | 3.3<br>xE-4 | ***   | -0.51    | 5.4<br>xE-4 | ***  | -1.7<br>xE-3 | 0.99        |    | 0.66     | 4.8<br>xE-6 | ***** | 0.28     | 0.07        |    |
| Th2              | -0.59    | 4.9<br>xE-5 | ****  | -0.24    | 0.11        |      | -0.22        | 0.21        |    | 0.29     | 0.09        |       | 0.27     | 0.08        |    |
| Th17             | -0.56    | 7.6<br>xE-5 | ****  | -0.36    | 0.01        | *    | -0.22        | 0.21        |    | 0.24     | 0.15        |       | 0.45     | 8.3<br>xE-3 | ** |
| Tfh              | -0.57    | 7.6<br>xE-5 | ****  | -0.37    | 0.01        | *    | -0.37        | 0.05        | *  | 0.32     | 0.07        |       | 0.35     | 0.04        | *  |
| Naive CD4        | -0.42    | 4.3<br>xE-3 | **    | -0.37    | 0.01        | *    | -0.28        | 0.12        |    | 0.25     | 0.14        |       | 0.38     | 0.03        | *  |
| Mem CD4          | -0.7     | 3.2<br>xE-7 | ***** | -0.16    | 0.26        |      | -0.27        | 0.12        |    | 0.29     | 0.09        |       | 0.51     | 3.4<br>xE-3 | ** |
| Fr. II eTreg     | -0.58    | 5.1<br>xE-5 | ****  | -0.39    | 8.1<br>xE-3 | **   | -0.33        | 0.07        |    | 0.07     | 0.68        |       | 0.46     | 8.3<br>xE-3 | ** |
| Naive CD8        | -0.43    | 2.9<br>xE-3 | **    | -0.38    | 9.8<br>xE-3 | **   | -0.17        | 0.32        |    | 0.33     | 0.07        |       | 0.1      | 0.53        |    |

|               |       |              |      |       |              |      |       |              |    |       |             |       |       |      |   |
|---------------|-------|--------------|------|-------|--------------|------|-------|--------------|----|-------|-------------|-------|-------|------|---|
| Mem CD8       | -0.35 | 0.02         | *    | -0.52 | 5.3<br>xE-4  | ***  | -0.07 | 0.7          |    | 0.64  | 5.5<br>xE-6 | ***** | 0.33  | 0.05 | * |
| mDC           | -0.56 | 7.6<br>xE-05 | **** | -0.59 | 3.9<br>xE-05 | **** | -0.41 | 0.02         | *  | 0.13  | 0.43        |       | 0.31  | 0.05 | * |
| pDC           | -0.38 | 9.6<br>xE-03 | **   | -0.43 | 3.8<br>xE-03 | **   | -0.11 | 0.57         |    | 0.21  | 0.18        |       | 0.3   | 0.05 | * |
| CD16p<br>Mono | -0.63 | 1.2<br>xE-05 | **** | -0.64 | 1.3<br>xE-05 | **** | -0.49 | 6.8<br>xE-03 | ** | -0.12 | 0.45        |       | 0.19  | 0.21 |   |
| CD16n<br>Mono | -0.58 | 4.9<br>xE-05 | **** | -0.4  | 8.1<br>xE-03 | **   | -0.28 | 0.12         |    | 0.22  | 0.18        |       | 0.37  | 0.03 | * |
| NK            | -0.34 | 0.02         | *    | -0.47 | 1.6<br>xE-03 | **   | 0.05  | 0.77         |    | 0.35  | 0.06        |       | -0.07 | 0.64 |   |

1 **Online Supplemental Table S6. Clinical characteristics of the enrolled SLE patients**

| Characteristics                   | HC          |                   | SLE         |                   |
|-----------------------------------|-------------|-------------------|-------------|-------------------|
|                                   | Test cohort | Validation cohort | Test cohort | Validation cohort |
|                                   | n = 37      | n = 55            | n = 49      | n = 58            |
| <b>Age</b>                        | 52.2 ± 13.8 | 44.2 ± 15.0       | 49.3 ± 10.6 | 45.9 ± 13.3       |
| <b>Gender, female</b>             | 32 (86.5%)  | 37 (67.3%)        | 44 (89.8%)  | 50 (86.2%)        |
| <b>Disease duration</b>           | NA          | NA                | 19.5 ± 12.0 | 13.2 ± 10.8       |
| <b>SLEDAI-2K</b>                  | NA          | NA                | 5.2 ± 3.5   | 6.9 ± 5.2         |
| <b>SDI</b>                        | NA          | NA                | 1.0 ± 1.2   | 0.9 ± 1.4         |
| <b>Complement decrease</b>        | NA          | NA                | 22 (44.9%)  | 28 (48.3%)        |
| <b>Leukopenia</b>                 | NA          | NA                | 41 (85.4%)  | 46 (80.7%)        |
| <b>Lymphopenia</b>                | NA          | NA                | 35 (71.4%)  | 44 (77.2%)        |
| <b>Plasmablast (% in total B)</b> | 1.4 ± 1.6   | 2.6 ± 2.7         | 9.0 ± 8.9   | 9.9 ± 9.8         |
| <b>Anti-dsDNA positive</b>        | NA          | NA                | 16 (32.7%)  | 22 (38.6%)        |
| <b>Anti-dsDNA titer</b>           | NA          | NA                | 21.2 ± 31.9 | 24.7 ± 60.2       |
| <b>Anti-Sm positive</b>           | NA          | NA                | 3 (6.1%)    | 9 (16.4%)         |
| <b>Anti-RNP positive</b>          | NA          | NA                | 14 (28.6%)  | 20 (37.0%)        |
| <b>APA positive</b>               | NA          | NA                | 16 (32.7%)  | 19 (36.5%)        |
| <b>Daily PSL dose (mg/day)</b>    | NA          | NA                | 5.4±2.4     | 7.5±10.4          |
| <b>PSL</b>                        | NA          | NA                | 46 (93.9%)  | 49 (84.5%)        |
| <b>Azathioprine</b>               | NA          | NA                | 3 (6.1%)    | 7 (12.1%)         |
| <b>Cyclophosphamide (p.o.)</b>    | NA          | NA                | 1 (2.0%)    | 0 (0%)            |
| <b>Cyclosporin A</b>              | NA          | NA                | 6 (12.2%)   | 6 (10.3%)         |
| <b>Tacrolimus</b>                 | NA          | NA                | 8 (16.3%)   | 6 (10.3%)         |
| <b>Mycophenolate mofetil</b>      | NA          | NA                | 2 (4.1%)    | 9 (15.6%)         |

1 **Table S7. Sorting Panel of Each Immune Cell Subset**

| Parent | Subset Name                                      | Gating Strategy                                            | Comment                |
|--------|--------------------------------------------------|------------------------------------------------------------|------------------------|
| B cell | Naïve B                                          | CD3-CD19+IgD+CD27-                                         |                        |
|        | Switched memory B (SM B)                         | CD3-CD19+IgD-CD27+                                         | test cohort only       |
|        | Switched memory B (SM B)                         | CD3-CD19+IgD-CD27+CD38-                                    | validation cohort only |
|        | Unswitched memory B (USM B)                      | CD3-CD19+IgD+CD27+                                         |                        |
|        | Double Negative B (DN B)                         | CD3-CD19+IgD-CD27-                                         |                        |
|        | Plasmablast                                      | CD3-CD19+IgD-CD27++CD38+                                   |                        |
| T cell | Th1                                              | CD3+CD4+CD25-CD45RA-CXCR5-CCR5-CXCR3+                      | test cohort only       |
|        | Th1                                              | CD3+CD4+CD8-CD25-CCR4-CCR6-CXCR3+CXCR5-<br>in non-NaiveCD4 | validation cohort only |
|        | Th2                                              | CD3+CD4+CD25-CD45RA-CXCR5-CCR5-CXCR3-                      | test cohort only       |
|        | Th2                                              | CD3+CD4+CD8-CD25-CCR4+CCR6-CXCR3-CXCR5-<br>in non-NaiveCD4 | validation cohort only |
|        | Th17                                             | CD3+CD4+CD25-CD45RA-CXCR5-CCR5+CXCR3-                      | test cohort only       |
|        | Th17                                             | CD3+CD4+CD8-CD25-CCR6+CXCR3-CXCR5-<br>in non-NaiveCD4      | validation cohort only |
|        | Tfh                                              | CD3+CD4+CD25-CXCR5+                                        | test cohort only       |
|        | Tfh                                              | CD3+CD4+CD8-CD25-CXCR5+ in non-NaiveCD4                    | validation cohort only |
|        | Naïve CD4 T (Naïve CD4)                          | CD3+CD4+CD45RA+                                            | test cohort only       |
|        | Naïve CD4 T (Naïve CD4)                          | CD3+CD4+CD8-CCR7+CD45RA+                                   | validation cohort only |
|        | Memory CD4 T (Mem CD4)                           | CD3+CD4+CD25-CD45RA-                                       | test cohort only       |
|        | Memory CD4 T (Mem CD4)                           | CD3+CD4+CD8-CD25- in non-NaiveCD4                          | validation cohort only |
|        | Fraction II effector regulatory T (Fr. II eTreg) | CD3+CD4+CD25 <sup>high</sup> CD45RA-                       | test cohort only       |

|                |                                                  |                                              |                        |
|----------------|--------------------------------------------------|----------------------------------------------|------------------------|
|                | Fraction II effector regulatory T (Fr. II eTreg) | CD3+CD4+CD8-CD25highCD45RA-                  | validation cohort only |
|                | Naïve CD8 T (Naïve CD8)                          | CD3+CD19-CD8+CD45RA+                         | test cohort only       |
|                | Naïve CD8 T (Naïve CD8)                          | CD3+CD4-CD8+CD45RA+CCR7+                     | validation cohort only |
|                | Memory CD8 T (Mem CD8)                           | CD3+CD19-CD8+CD45RA-                         | test cohort only       |
|                | NK                                               | CD3-CD19-CD56+CD14-                          | test cohort only       |
| Monocyte       | CD16 positive monocytes (CD16p Mono)             | CD3-CD19-CD56-HLADR+CD14+CD16+               |                        |
|                | CD16 negative monocytes (CD16n Mono)             | CD3-CD19-CD56-HLADR+CD14+CD16-               |                        |
| Dendritic Cell | Myeloid Dendritic Cells (mDC)                    | CD3-CD19-CD56-HLADR+CD14-(CD16-)CD11c+CD123- |                        |
|                | Plasmacytoid Dendritic Cells (pDC)               | CD3-CD19-CD56-HLADR+CD14-(CD16-)CD11c-CD123+ |                        |
